# Supplementary material for: Reliability and Validity of Self-Reported Vascular Risk Factors: Hypertension, Diabetes, and Heart Disease, in a Multi-Ethnic Community Based Study of Aging and Dementia
Source: PubMed Central journal article supplement — J Alzheimers Dis. 2023 Aug 29;95(1):275–85. doi: 10.3233/JAD-230374 (PMC10578288; doi:10.3233/jad-230374), 2023-08-29
Supplement: jad-95-jad230374-s001.pdf [file jad-95-jad230374-s001.pdf]

# Supplementary Material

## Reliability and Validity of Self-Reported Vascular Risk Factors: Hypertension, Diabetes, and Heart Disease, in a Multi-Ethnic Community Based Study of Aging and Dementia

**Supplementary Table 1.** Frequencies of individuals with self-reported and measured hypertension, diabetes, and heart disease.

| Hypertension               |       | Measured         |                  |                   | Frequency of Yes |     | p      | Direction |
|----------------------------|-------|------------------|------------------|-------------------|------------------|-----|--------|-----------|
|                            |       | Yes              | No               | Total             | SR               | M   |        |           |
| Self-reported              | Yes   | 1394 (96%; 89%)  | 65 (4%; 22%)     | 1459 (100%; 78%)  | 78%              | 84% | <0.001 | SR < M    |
|                            | No    | 179 (44%; 11%)   | 232 (56%; 78%)   | 411 (100%; 22%)   |                  |     |        |           |
|                            | Total | 1573 (84%; 100%) | 297 (16%; 100%)  | 1870 (100%; 100%) |                  |     |        |           |
| Diabetes<br>(definition 1) |       | Measured         |                  |                   | Frequency of Yes |     | p      | Direction |
|                            |       | Yes              | No               | Total             | SR               | M   |        |           |
| Self-reported              | Yes   | 355 (77%; 88%)   | 107 (23%; 7%)    | 462 (100%; 25%)   | 25%              | 22% | 0.030  | SR > M    |
|                            | No    | 50 (4%; 12%)     | 1358 (96%; 93%)  | 1408 (100%; 75%)  |                  |     |        |           |
|                            | Total | 405 (22%; 100%)  | 1465 (78%; 100%) | 1870 (100%; 100%) |                  |     |        |           |
| Diabetes<br>(definition 2) |       | Measured         |                  |                   | Frequency of Yes |     | p      | Direction |
|                            |       | Yes              | No               | Total             | SR               | M   |        |           |
| Self-reported              | Yes   | 355 (77%; 92%)   | 107 (23%; 7%)    | 462 (100%; 25%)   | 25%              | 21% | 0.003  | SR > M    |
|                            | No    | 31 (2%; 8%)      | 1377 (98%; 93%)  | 1408 (100%; 75%)  |                  |     |        |           |
|                            | Total | 386 (21%; 100%)  | 1484 (79%; 100%) | 1870 (100%; 100%) |                  |     |        |           |
| Heart disease              |       | Measured         |                  |                   | Frequency of Yes |     | p      | Direction |
|                            |       | Yes              | No               | Total             | SR               | M   |        |           |
| Self-reported              | Yes   | 297 (44%; 86%)   | 373 (56%; 19%)   | 670 (100%; 36%)   | 36%              | 19% | <0.001 | SR > M    |
|                            | No    | 49 (4%; 14%)     | 1151 (96%; 81%)  | 1200 (100%; 64%)  |                  |     |        |           |
|                            | Total | 346 (19%; 100%)  | 1524 (81%; 100%) | 1870 (100%; 100%) |                  |     |        |           |

Definition 1, hemoglobin A1C level  $\geq 6.5\%$  at last visit or the use of any medications to manage diabetes at initial or follow-up visits; definition 2, hemoglobin A1C level  $\geq 7\%$  at last visit or diabetes medication use at initial or follow-up visits; SR, self-report; M, measured; p, p-value of testing a difference between proportions of having self-reported and measured hypertension, diabetes, or heart disease; (%; %), row percentage; column percentage.

**Supplementary Table 2.** Distribution of the proportion of positive self-reported hypertension, diabetes, and heart disease among individuals in longitudinal WHICAP cohort, before and after excluding the first consecutive negative self-reports of participants when they later consistently had positive self-reports.

|       | Before exclusion |       |          |       |               |       | After exclusion |       |          |       |               |       |
|-------|------------------|-------|----------|-------|---------------|-------|-----------------|-------|----------|-------|---------------|-------|
|       | Hypertension     |       | Diabetes |       | Heart Disease |       | Hypertension    |       | Diabetes |       | Heart Disease |       |
| Mean  | n                | %     | n        | %     | n             | %     | n               | %     | n        | %     | n             | %     |
| 0.00  | 232              | 17.75 | 962      | 73.66 | 779           | 59.60 | 232             | 18.71 | 962      | 75.81 | 779           | 63.75 |
| 0.14  | 1                | 0.08  | 1        | 0.08  | 1             | 0.08  | 0               | 0.00  | 0        | 0.00  | 1             | 0.08  |
| 0.17  | 3                | 0.23  | 6        | 0.46  | 3             | 0.23  | 1               | 0.08  | 1        | 0.08  | 0             | 0.00  |
| 0.20  | 7                | 0.54  | 5        | 0.38  | 11            | 0.84  | 1               | 0.08  | 2        | 0.16  | 1             | 0.08  |
| 0.22  | 0                | 0.00  | 0        | 0.00  | 1             | 0.08  | 0               | 0.00  | 0        | 0.00  | 1             | 0.08  |
| 0.25  | 1                | 0.08  | 5        | 0.38  | 16            | 1.22  | 0               | 0.00  | 3        | 0.24  | 4             | 0.33  |
| 0.29  | 3                | 0.23  | 1        | 0.08  | 8             | 0.61  | 1               | 0.08  | 0        | 0.00  | 5             | 0.41  |
| 0.30  | 1                | 0.08  | 0        | 0.00  | 0             | 0.00  | 1               | 0.08  | 0        | 0.00  | 0             | 0.00  |
| 0.33  | 28               | 2.14  | 18       | 1.38  | 33            | 2.52  | 4               | 0.32  | 9        | 0.71  | 7             | 0.57  |
| 0.40  | 7                | 0.54  | 4        | 0.31  | 15            | 1.15  | 3               | 0.24  | 1        | 0.08  | 14            | 1.15  |
| 0.43  | 2                | 0.15  | 4        | 0.31  | 2             | 0.15  | 1               | 0.08  | 2        | 0.16  | 2             | 0.16  |
| 0.50  | 53               | 4.06  | 25       | 1.91  | 70            | 5.36  | 12              | 0.97  | 1        | 0.08  | 15            | 1.23  |
| 0.57  | 6                | 0.46  | 0        | 0.00  | 3             | 0.23  | 2               | 0.16  | 0        | 0.00  | 2             | 0.16  |
| 0.60  | 5                | 0.38  | 5        | 0.38  | 9             | 0.69  | 3               | 0.24  | 4        | 0.32  | 6             | 0.49  |
| 0.62  | 1                | 0.08  | 0        | 0.00  | 0             | 0.00  | 1               | 0.08  | 0        | 0.00  | 0             | 0.00  |
| 0.67  | 63               | 4.82  | 26       | 1.99  | 84            | 6.43  | 20              | 1.61  | 7        | 0.55  | 51            | 4.17  |
| 0.70  | 1                | 0.08  | 0        | 0.00  | 0             | 0.00  | 1               | 0.08  | 0        | 0.00  | 0             | 0.00  |
| 0.71  | 2                | 0.15  | 1        | 0.08  | 3             | 0.23  | 2               | 0.16  | 1        | 0.08  | 2             | 0.16  |
| 0.75  | 25               | 1.91  | 5        | 0.38  | 18            | 1.38  | 9               | 0.73  | 1        | 0.08  | 10            | 0.82  |
| 0.78  | 1                | 0.08  | 0        | 0.00  | 0             | 0.00  | 1               | 0.08  | 0        | 0.00  | 0             | 0.00  |
| 0.80  | 13               | 0.99  | 4        | 0.31  | 6             | 0.46  | 10              | 0.81  | 1        | 0.08  | 5             | 0.41  |
| 0.83  | 10               | 0.77  | 3        | 0.23  | 1             | 0.08  | 8               | 0.65  | 2        | 0.16  | 1             | 0.08  |
| 0.86  | 6                | 0.46  | 2        | 0.15  | 3             | 0.23  | 2               | 0.16  | 1        | 0.08  | 2             | 0.16  |
| 0.88  | 1                | 0.08  | 0        | 0.00  | 0             | 0.00  | 1               | 0.08  | 0        | 0.00  | 0             | 0.00  |
| 0.89  | 1                | 0.08  | 0        | 0.00  | 0             | 0.00  | 1               | 0.08  | 0        | 0.00  | 0             | 0.00  |
| 0.90  | 1                | 0.08  | 0        | 0.00  | 0             | 0.00  | 0               | 0.00  | 0        | 0.00  | 0             | 0.00  |
| 1.00  | 833              | 63.73 | 229      | 17.53 | 241           | 18.44 | 923             | 74.44 | 271      | 21.36 | 314           | 25.70 |
| Total | 1,307            | 100   | 1,306    | 100   | 1,307         | 100   | 1,240           | 100   | 1,269    | 100   | 1,222         | 100   |

Mean, number of positive self-reported risk factor over the number of visits within an individual; n, number of individuals; %, percentage of individuals.
